# Supplementary material
Source: publisher figshare collection journal article supplement (https://frontiersin.figshare.com/ndownloader/files/20177975)
Supplement: Supplementary file 1 [file 20177975]

**SUPPLEMENTAL TABLE 1 | Visual estimates of percent ground cover of lichens, mosses, Cyanobacteria, plant litter, and rock in burned and unburned interspace and shrub biocrusts one year after the fire.** Values are means (*n* = 9) ± SEM.

|  | Shrub biocrust | |  | Interspace biocrust | |
| --- | --- | --- | --- | --- | --- |
|  | 1 Week | 1 Year |  | 1 Week | 1 Year |
| *Unburned* |  |  |  |  |  |
| Cyanobacteria | 18 ± 3.8 | 17 ± 5.6 |  | 53 ± 4.7 | 47 ± 6.1 |
| Moss |  |  |  |  |  |
| *Syntrichia caninervis* | 7.5 ± 1.8 | 4.4 ± 1.1 |  | 11.8 ± 2.9 | 6.3 ± 2.2 |
| Lichens |  |  |  |  |  |
| *Caloplaca tominii* | 0 | 0 |  | 1.3 ± 0.83 | 0.63 ± 0.63 |
| *Candelariella citrina* | 0.63 ± 0.63 | 1.3 ± 0.83 |  | 0 | 2.5 ± 1.0 |
| *Collema tenax* | 1.3 ± 1.3 | 4.4 ± 1.6 |  | 5.6 ± 2.5 | 16 ± 3.5 |
| *Psora decipiens* | 0 | 0 |  | 3.8 ± 3.8 | 2.5 ± 2.5 |
| *Thrombium epigaeum* | 0 | 0 |  | 2.5 ± 1.7 | 0.63 ± 0.63 |
| *Toninia sedifolia* | 3.8 ± 2.1 | 0 |  | 12 ± 2.7 | 3.1 ± 1.4 |
| Rock | 0 | 1.3 ± 0.83 |  | 4.4 ± 1.6 | 5.0 ± 1.8 |
| Grass species | 1.3 ± 0.83 | 0 |  | 2.5 ± 1.4 | 0 |
| Forb species | 0 | 0 |  | 0 | 1.9 ± 1.9 |
| Plant litter | 68 ± 8.5 | 71 ± 8.1 |  | 2.5 ± 1.9 | 16 ± 2.8 |
|  |  |  |  |  |  |
| *Burned* |  |  |  |  |  |
| Burned soils | 100 ± 0 | 0 |  | 100 ± 0 | 0 |
| Bare soils | 0 | 86 ± 5.4 |  | 0 | 93 ± 5.1 |
| Rock | 0 | 5.0 ± 5.0 |  | 0 | 5.0 ± 5.0 |
| Grass species | 0 | 3.8 ± 3.8 |  | 0 | 0 |
| Forb species | 0 | 3.1 ± 1.4 |  | 0 | 1.9 ± 1.9 |
| Plant litter | 0 | 7.5 ± 3.1 |  | 0 | 0.63 ± 0.63 |
